# Supplementary material for: A first-principles study of the BC3N2 monolayer and a BC3N2/graphene heterostructure as promising anode materials for sodium-ion batteries
Source: Royal Society of Chemistry journal article supplement (doi:10.1039/d3cp04804g), 2024-01-01
Supplement: d3cp04804g1.pdf [file d3cp04804g1.pdf]

## Supporting Information for

### **A first-principle study of $\text{BC}_3\text{N}_2$ monolayer and $\text{BC}_3\text{N}_2/\text{graphene}$ heterostructure as promising anode materials for sodium-ion batteries**

Xiao-Juan Ye <sup>a</sup>, Rui Zhao <sup>b</sup>, Xin Xiong <sup>a</sup>, Xiao-Han Wang <sup>a</sup>, and Chun-Sheng Liu <sup>b\*</sup>

<sup>a</sup> College of Integrated Circuit Science and Engineering, Nanjing University of Posts and Telecommunications, Nanjing 210023, China

<sup>b</sup> College of Electronic and Optical Engineering, Nanjing University of Posts and Telecommunications, Nanjing 210023, China

Email: [cslu@njupt.edu.cn](mailto:cslu@njupt.edu.cn)

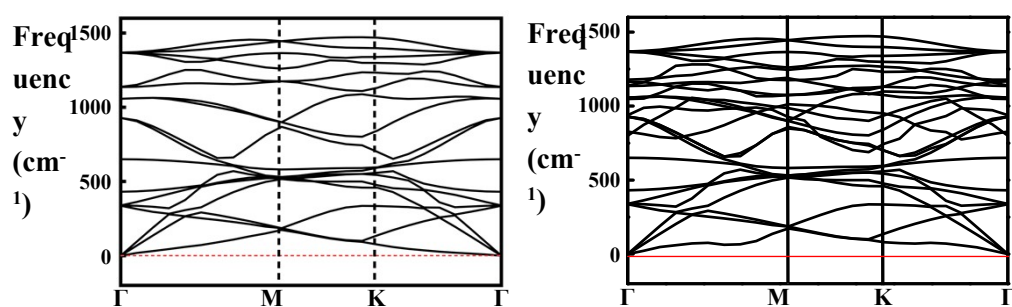

Fig. S1 Phonon dispersion curves of (a)  $\text{BC}_3\text{N}_2$  monolayer and (b)  $\text{Na}_2\text{BC}_3\text{N}_2$ .

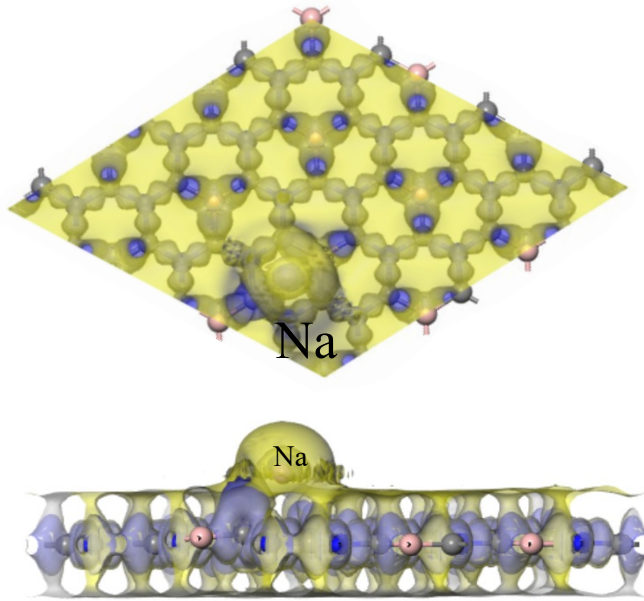

**Fig. S2** The top and side view of charge density differences of  $\text{BC}_3\text{N}_2$  with a Na adsorbed at H site.

The iso-surface value is  $0.01 \text{ e}\text{\AA}^{-3}$ , the yellow and blue areas represent the loss and gain of electrons, respectively.

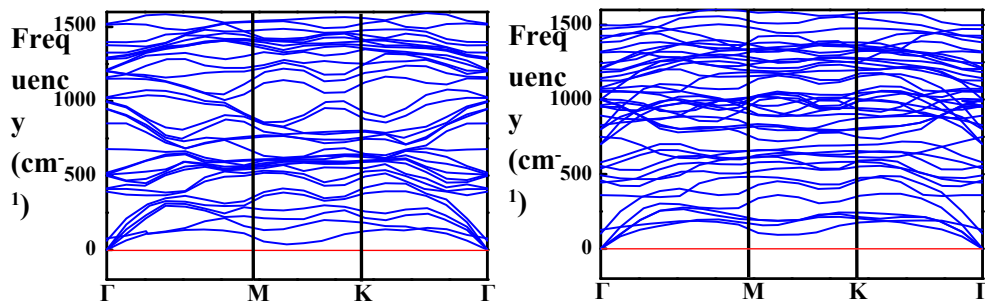

**Fig. S3** Phonon dispersion curves of (a) B/G heterostructure (AB stacking) and (b) B/G heterostructure with Na atom adsorbed.

The calculated linear elastic constants ( $C_{ij}$ ) of  $\text{BC}_3\text{N}_2$  and B/G heterostructure are shown

in Table S1, which satisfies with the Born criteria ( $C_{11} > C_{12}$ ,  $C_{66} > 0$ ), indicating the mechanical stability of  $\text{BC}_3\text{N}_2$  and B/G heterostructure with and without Na atoms adsorbed.

**Table S1. The calculated linear elastic constants ( $C_{ij}$ ) of  $\text{BC}_3\text{N}_2$  monolayer and B/G heterostructure with and without Na atoms adsorbed.**

|                                    | $C_{11}$ (GPa) | $C_{12}$ (GPa) | $C_{66}$ (GPa) |
|------------------------------------|----------------|----------------|----------------|
| $\text{BC}_3\text{N}_2$            | 401.2          | 65.5           | 167.8          |
| $\text{Na}_2\text{BC}_3\text{N}_2$ | 398.6          | 70.8           | 167.0          |
| B/G                                | 630.4          | 119.3          | 284.4          |
| $\text{Na}_{3.625}\text{B/G}$      | 625.5          | 123.6          | 284.1          |
